# Supplementary material for: Assessing and broadening genetic diversity of a rapeseed germplasm collection
Source: PubMed Central journal article supplement — Breed Sci. 2014 Dec 1;64(4):321–30. doi: 10.1270/jsbbs.64.321 (PMC4267306; doi:10.1270/jsbbs.64.321), 2014-12-01
Supplement: 64_321-s2.pdf [file 64_321-s2.pdf]

**Supplemental Table 1.** List of DH lines used for screening SSR markers

| DH line | Original inbred lines |                  |         |
|---------|-----------------------|------------------|---------|
|         | Name                  | Accession number | Country |
| 3DH014  | Yangyou1              | 2680             | China   |
| 3DH013  | Qingyou6              | 1310             | China   |
| 3DH020  | Yunyou11              | 3100             | China   |
| 3DH032  | P7                    | 3382             | Poland  |
| 3DH065  | WW.Hanna              | 3484             | Sweden  |
| 3DH050  | H54                   | 3482             | Sweden  |
| 3DH099  | Bok.Wok 13            | 3502             | USA     |
| 3DH022  | Fuyou1                | 3109             | China   |

**Supplemental Table 2.** List of rapeseed inbred lines used in present study

| Accession number | Name               | Country/Region    | Type            |
|------------------|--------------------|-------------------|-----------------|
| 1183             | Shengli52          | Shanghai (China)  | Semi-winter OSR |
| 1188             | Gongnong1          | Shanghai (China)  | Semi-winter OSR |
| 1193             | Huyou2             | Shanghai (China)  | Semi-winter OSR |
| 1212             | Ningyou1           | Jiangsu (China)   | Semi-winter OSR |
| 1222             | 363                | Hubei (China)     | Semi-winter OSR |
| 1228             | Ganyou2            | Hubei (China)     | Semi-winter OSR |
| 1230             | Ganyou4            | Hubei (China)     | Semi-winter OSR |
| 1237             | Huayou3            | Huazhong (China)  | Semi-winter OSR |
| 1244             | Huayou13           | Hubei (China)     | Semi-winter OSR |
| 1264             | Chuannongchangjiao | Sichuan (China)   | Semi-winter OSR |
| 1287             | Yiyou3             | Sichuan (China)   | Semi-winter OSR |
| 1307             | Yunyou7            | Yunnan (China)    | Semi-winter OSR |
| 1309             | Yunyou49           | Yunnan (China)    | Semi-winter OSR |
| 2638             | Luojingxuanxi      | Shanghai (China)  | Semi-winter OSR |
| 2649             | Xinghuangha        | Shanghai (China)  | Semi-winter OSR |
| 2653             | Youguangye         | Shanghai (China)  | Semi-winter OSR |
| 2679             | Yang2008           | Jiangsu (China)   | Semi-winter OSR |
| 2683             | Sui1-4             | Jiangsu (China)   | Semi-winter OSR |
| 2700             | 3209               | Anhui (China)     | Semi-winter OSR |
| 2714             | Guangde741         | Anhui (China)     | Semi-winter OSR |
| 2719             | 698-141            | Anhui (China)     | Semi-winter OSR |
| 2787             | Ganyou5            | Hubei (China)     | Semi-winter OSR |
| 2821             | Huayou16           | Huazhong (China)  | Semi-winter OSR |
| 2823             | Huahuang1          | Huazhong (China)  | Semi-winter OSR |
| 2840             | 57A                | Hunan (China)     | Semi-winter OSR |
| 2873             | 6024-2             | Hunan (China)     | Semi-winter OSR |
| 2874             | 6012-1             | Hunan (China)     | Semi-winter OSR |
| 2875             | 6024-1             | Hunan (China)     | Semi-winter OSR |
| 2889             | 78007              | Hunan (China)     | Semi-winter OSR |
| 2890             | 36220              | Hunan (China)     | Semi-winter OSR |
| 2893             | 4050-4149          | Hunan (China)     | Semi-winter OSR |
| 2894             | 77054-2            | Hunan (China)     | Semi-winter OSR |
| 2912             | 3145-60            | Hunan (China)     | Semi-winter OSR |
| 2914             | Eh3143             | Hunan (China)     | Semi-winter OSR |
| 2917             | 4092               | Hunan (China)     | Semi-winter OSR |
| 2924             | 3W042              | Hunan (China)     | Semi-winter OSR |
| 2972             | Yueyang84-8        | Hunan (China)     | Semi-winter OSR |
| 3043             | Binyou1            | Jiangxi (China)   | Semi-winter OSR |
| 3050             | 408-8              | Jiangxi (China)   | Semi-winter OSR |
| 3067             | 72-2               | Chongqing (China) | Semi-winter OSR |
| 3074             | Jinyou15           | Sichuan (China)   | Semi-winter OSR |
| 3078             | Piyou23            | Sichuan (China)   | Semi-winter OSR |
| 3086             | 213                | Sichuan (China)   | Semi-winter OSR |
| 3100             | Yunyou11           | Yunnan (China)    | Semi-winter OSR |
| 3101             | Yunyou12           | Yunnan (China)    | Semi-winter OSR |
| 4532             | Baihua (2)         | Anhui (China)     | Semi-winter OSR |
| 4533             | Baihua (3)         | Anhui (China)     | Semi-winter OSR |
| 4553             | Zaofeng5           | Shanxi (China)    | Semi-winter OSR |
| 4586             | Zoumayang          | Hubei (China)     | Semi-winter OSR |
| 4588             | Geleche Yangyoucai | Hubei (China)     | Semi-winter OSR |
| 4601             | 85-1               | Hubei (China)     | Semi-winter OSR |
| 4604             | Enyou2             | Hubei (China)     | Semi-winter OSR |
| 4605             | Zhongyoudijie1     | Hubei (China)     | Semi-winter OSR |
| 4625             | 88-161             | Hunan (China)     | Semi-winter OSR |
| 4626             | Penglai1           | Hunan (China)     | Semi-winter OSR |
| 4636             | 320                | Hunan (China)     | Semi-winter OSR |
| 4678             | III-227            | Sichuan (China)   | Semi-winter OSR |
| 4679             | III-229            | Sichuan (China)   | Semi-winter OSR |
| 4708             | 88-2               | Sichuan (China)   | Semi-winter OSR |
| 4711             | 86126-1-2          | Sichuan (China)   | Semi-winter OSR |
| 4721             | 1-63               | Sichuan (China)   | Semi-winter OSR |
| 4755             | 86-18-II-14        | Chongqing (China) | Semi-winter OSR |
| 4767             | Kaiyou1            | Guizhou (China)   | Semi-winter OSR |
| 4793             | 87-9               | Hubei (China)     | Semi-winter OSR |
| 5721             | 6084               | Anhui (China)     | Semi-winter OSR |
| 5731             | Gsb612             | Anhui (China)     | Semi-winter OSR |
| 5736             | Gsb641             | Anhui (China)     | Semi-winter OSR |

Supplemental Table 2. (continued)

| Accession number | Name            | Country/Region   | Type            |
|------------------|-----------------|------------------|-----------------|
| 5754             | 950246          | Anhui (China)    | Semi-winter OSR |
| 5755             | 950229          | Anhui (China)    | Semi-winter OSR |
| 5756             | 951061          | Anhui (China)    | Semi-winter OSR |
| 5913             | 97Xuan          | Sichuan (China)  | Semi-winter OSR |
| 5914             | Chuangyou96li45 | Sichuan (China)  | Semi-winter OSR |
| 5916             | I-Y-14youcai    | Sichuan (China)  | Semi-winter OSR |
| 5940             | Jianyang Youcai | Sichuan (China)  | Semi-winter OSR |
| 5941             | Y018            | Sichuan (China)  | Semi-winter OSR |
| 5947             | Hea20           | Sichuan (China)  | Semi-winter OSR |
| 5951             | 93355           | Sichuan (China)  | Semi-winter OSR |
| 5954             | 90-5047         | Sichuan (China)  | Semi-winter OSR |
| 5963             | Chuangyou92-005 | Sichuan (China)  | Semi-winter OSR |
| 5964             | Chuangyouh-53   | Sichuan (China)  | Semi-winter OSR |
| 5965             | Chuangyou92-028 | Sichuan (China)  | Semi-winter OSR |
| 5973             | Mianhui1        | Sichuan (China)  | Semi-winter OSR |
| 5979             | Mianza94-13     | Sichuan (China)  | Semi-winter OSR |
| 5986             | Chuangyou933059 | Sichuan (China)  | Semi-winter OSR |
| 5987             | Chuangyou92-054 | Sichuan (China)  | Semi-winter OSR |
| 5989             | Heiyoucai       | Sichuan (China)  | Semi-winter OSR |
| 5990             | Chengkoushengli | Sichuan (China)  | Semi-winter OSR |
| 6038             | Kao-48          | Hubei (China)    | Semi-winter OSR |
| 6043             | Zhongshuang4    | Hubei (China)    | Semi-winter OSR |
| 6140             | Hn-9464         | South Korea      | Semi-winter OSR |
| 6648             | Zheyu17         | Zhejiang (China) | Semi-winter OSR |
| 6871             | P6036-2         | Hubei (China)    | Semi-winter OSR |
| 6873             | Zhongshuang12   | Hubei (China)    | Semi-winter OSR |
| 6894             | 99-1055         | Jiangsu (China)  | Semi-winter OSR |
| 6932             | Zhongshuang9    | Hubei (China)    | Semi-winter OSR |
| 6940             | Zheyu18         | Zhejiang (China) | Semi-winter OSR |
| 6941             | You88           | Zhejiang (China) | Semi-winter OSR |
| 6943             | Huyou17         | Shanghai (China) | Semi-winter OSR |
| 6968             | Zhongnongyou136 | Hubei (China)    | Semi-winter OSR |
| 6979             | Huyou18         | Shanghai (China) | Semi-winter OSR |
| 7022             | Hongyou3        | Yunnan (China)   | Semi-winter OSR |
| 7028             | 24729           | Hubei (China)    | Semi-winter OSR |
| 7412             | Suj209          | Jiangsu (China)  | Semi-winter OSR |
| 7413             | Zheyu6001       | Zhejiang (China) | Semi-winter OSR |
| 7415             | 68232           | Hubei (China)    | Semi-winter OSR |
| 7421             | Yan6015         | Jiangsu (China)  | Semi-winter OSR |
| 7422             | Yangj6771       | Jiangsu (China)  | Semi-winter OSR |
| 1345             | Zephyr          | Canada           | Spring OSR      |
| 1346             | Midasi          | Canada           | Spring OSR      |
| 1347             | Turret          | Canada           | Spring OSR      |
| 1348             | ORO             | Canada           | Spring OSR      |
| 3109             | Fuyou1          | Fujian (China)   | Spring OSR      |
| 3112             | Meijian         | Tibet (China)    | Spring OSR      |
| 3251             | Semuda 16/81    | Canada           | Spring OSR      |
| 3253             | Golda           | Canada           | Spring OSR      |
| 3264             | Ab448           | Australia        | Spring OSR      |
| 3271             | Bln240          | Australia        | Spring OSR      |
| 3272             | Bln241          | Australia        | Spring OSR      |
| 3274             | Bln247          | Australia        | Spring OSR      |
| 3275             | DH9-2           | Australia        | Spring OSR      |
| 3278             | Marnoo          | Australia        | Spring OSR      |
| 3279             | Ru6             | Australia        | Spring OSR      |
| 3282             | Wesreo          | Australia        | Spring OSR      |
| 3286             | Wesbrook        | Australia        | Spring OSR      |
| 3288             | Wille           | Danmark          | Spring OSR      |
| 3289             | Dandi           | Denmark          | Spring OSR      |
| 3359             | HJa82414        | Finland          | Spring OSR      |
| 3360             | Hja 82470       | Finland          | Spring OSR      |
| 3361             | Hja 82703       | Finland          | Spring OSR      |
| 3362             | Hja 82708       | Finland          | Spring OSR      |
| 3398             | Prota 3129      | France           | Spring OSR      |
| 3399             | Remeo           | France           | Spring OSR      |
| 3404             | Topas-15        | France           | Spring OSR      |
| 3417             | Lingot          | France           | Spring OSR      |

Supplemental Table 2. (continued)

| Accession number | Name               | Country/Region       | Type       |
|------------------|--------------------|----------------------|------------|
| 3439             | Cresor             | France               | Spring OSR |
| 3450             | Wipot              | Norway               | Spring OSR |
| 3464             | Omega              | Sweden               | Spring OSR |
| 3469             | Ww 1307            | Sweden               | Spring OSR |
| 3472             | Olga               | Sweden               | Spring OSR |
| 3483             | H55                | Sweden               | Spring OSR |
| 3486             | Sv.Tyko            | Sweden               | Spring OSR |
| 3487             | Sv.Global          | Sweden               | Spring OSR |
| 3489             | Wester Zn6-2836    | Canada               | Spring OSR |
| 3493             | Target             | Sweden               | Spring OSR |
| 3494             | Altex              | Sweden               | Spring OSR |
| 3495             | Andor              | Sweden               | Spring OSR |
| 3503             | Dac Chosen         | USA                  | Spring OSR |
| 4822             | Xuanma2            | Heilongjiang (China) | Spring OSR |
| 5067             | Pivot              | Canada               | Spring OSR |
| 5073             | Shiralee           | Australia            | Spring OSR |
| 5075             | Yic Kaden          | Australia            | Spring OSR |
| 5085             | Optima             | Denmark              | Spring OSR |
| 5086             | Wikki              | Denmark              | Spring OSR |
| 5171             | Sielecki           | France               | Spring OSR |
| 5202             | Tornado            | Sweden               | Spring OSR |
| 5209             | Legend             | Sweden               | Spring OSR |
| 5210             | Grant              | Sweden               | Spring OSR |
| 5214             | Topas.No. 6050     | Sweden               | Spring OSR |
| 5218             | Celebra            | Canada               | Spring OSR |
| 6019             | 9918               | Qinghai (China)      | Spring OSR |
| 6106             | Cresor             | France               | Spring OSR |
| 6115             | Startigh           | Sweden               | Spring OSR |
| 6117             | Bounty             | Sweden               | Spring OSR |
| 6141             | Garrison           | Sweden               | Spring OSR |
| 6143             | Coronet            | Sweden               | Spring OSR |
| 6146             | guue               | Sweden               | Spring OSR |
| 6154             | Iupiter            | Sweden               | Spring OSR |
| 6192             | Wester             | Canada               | Spring OSR |
| 6219             | Hanna              | Sweden               | Spring OSR |
| 6220             | Marnoo-2           | Australia            | Spring OSR |
| 6228             | ReainaII           | Sweden               | Spring OSR |
| 1334             | Shengli Youcai     | Japan                | Winter OSR |
| 1339             | Chikuzen           | Japan                | Winter OSR |
| 1343             | Wase Cyousenn      | Japan                | Winter OSR |
| 1355             | Europ              | France               | Winter OSR |
| 1360             | Poland(2)          | Poland               | Winter OSR |
| 1368             | England Short      | United Kingdom       | Winter OSR |
| 1370             | Major              | France               | Winter OSR |
| 1373             | Primor             | France               | Winter OSR |
| 2734             | 2734               | Italy                | Winter OSR |
| 2775             | Nanyang41          | Henan (China)        | Winter OSR |
| 2776             | Kai07              | Henan (China)        | Winter OSR |
| 2779             | Xinglong1          | Henan (China)        | Winter OSR |
| 2784             | 51                 | Henan (China)        | Winter OSR |
| 2786             | Heyou1             | Henan (China)        | Winter OSR |
| 3236             | Dong-Hae23         | Japan                | Winter OSR |
| 3238             | Kojo 57            | Japan                | Winter OSR |
| 3239             | Norin 34           | Japan                | Winter OSR |
| 3240             | Ganpol             | Japan                | Winter OSR |
| 3244             | Aomori             | Japan                | Winter OSR |
| 3245             | Norin16            | Japan                | Winter OSR |
| 3254             | Narc               | Pakistan             | Winter OSR |
| 3258             | Changranyoucai-2   | North Korea          | Winter OSR |
| 3260             | Rongshanyoucai     | North Korea          | Winter OSR |
| 3262             | Superlati-Velot601 | New Zealand          | Winter OSR |
| 3263             | Rangi              | New Zealand          | Winter OSR |
| 3269             | Liraglu            | Australia            | Winter OSR |
| 3293             | H19                | Hungary              | Winter OSR |
| 3296             | Liradonne          | Germany              | Winter OSR |
| 3304             | Expander           | Germany              | Winter OSR |
| 3305             | Erra               | Germany              | Winter OSR |

**Supplemental Table 2.** (continued)

| Accession number | Name             | Country/Region | Type       |
|------------------|------------------|----------------|------------|
| 3306             | Quinta           | Germany        | Winter OSR |
| 3308             | Ligora           | Germany        | Winter OSR |
| 3319             | Dsv-Sr50         | Germany        | Winter OSR |
| 3323             | Doral            | Germany        | Winter OSR |
| 3345             | H26              | Germany        | Winter OSR |
| 3349             | H32              | Germany        | Winter OSR |
| 3351             | Sollux           | Germany        | Winter OSR |
| 3366             | H44              | Russia         | Winter OSR |
| 3368             | H46              | Russia         | Winter OSR |
| 3369             | H47              | Russia         | Winter OSR |
| 3374             | Janpol           | Poland         | Winter OSR |
| 3378             | Tripol           | Poland         | Winter OSR |
| 3381             | P6               | Poland         | Winter OSR |
| 3383             | H38              | Poland         | Winter OSR |
| 3386             | Mikado           | United Kingdom | Winter OSR |
| 3388             | 77-258           | United Kingdom | Winter OSR |
| 3390             | Gonda            | Canada         | Winter OSR |
| 3392             | P20              | United Kingdom | Winter OSR |
| 3394             | Mochowski        | France         | Winter OSR |
| 3396             | Nachan           | France         | Winter OSR |
| 3427             | H25              | France         | Winter OSR |
| 3455             | H40              | Czech          | Winter OSR |
| 3457             | P11              | Czech          | Winter OSR |
| 3482             | H54              | Sweden         | Winter OSR |
| 5068             | Annick           | South Korea    | Winter OSR |
| 5087             | Viking           | Denmark        | Winter OSR |
| 5106             | Parter           | Germany        | Winter OSR |
| 5160             | Falcon           | Germany        | Winter OSR |
| 5175             | Ew-2             | United Kingdom | Winter OSR |
| 5197             | Roman-1          | Holand         | Winter OSR |
| 5226             | Arabelle         | Canada         | Winter OSR |
| 5787             | 96786            | Shanxi (China) | Winter OSR |
| 5788             | 961331           | Shanxi (China) | Winter OSR |
| 5863             | 96628            | Shanxi (China) | Winter OSR |
| 5897             | Huangzi4         | Shanxi (China) | Winter OSR |
| 5901             | Huangzi8         | Shanxi (China) | Winter OSR |
| 6150             | Guuiver          | Sweden         | Winter OSR |
| 6155             | Casion           | Sweden         | Winter OSR |
| 6177             | Haya natane      | Japan          | Winter OSR |
| 6178             | Asaju natane     | Japan          | Winter OSR |
| 6179             | Tojiwa natane    | Japan          | Winter OSR |
| 6185             | Kinkai natane    | Japan          | Winter OSR |
| 6187             | Miyukai natane   | Japan          | Winter OSR |
| 6188             | Yiwashilo natane | Japan          | Winter OSR |
| 6197             | Gesunder         | Germany        | Winter OSR |
| 6198             | Disamant         | Germany        | Winter OSR |
| 6206             | Mar              | Poland         | Winter OSR |

**Supplemental Table 3.** List of wild *Brassica oleracea*, resynthesized *B. napus*, modern cultivars and F<sub>1</sub> lines

| Accession number | Name                              | Country/Region   | Type                                    |
|------------------|-----------------------------------|------------------|-----------------------------------------|
| 8WS002           | C1-3                              | Spain            | <i>B. oleracea</i> ssp. <i>oleracea</i> |
| 8WS006           | C1-7A                             | Spain            | <i>B. oleracea</i> ssp. <i>oleracea</i> |
| 8WS009           | C1-9A                             | Spain            | <i>B. oleracea</i> ssp. <i>oleracea</i> |
| 8WS014           | C2-4                              | Spain            | <i>B. oleracea</i> ssp. <i>oleracea</i> |
| 8WS017           | C2-7A                             | Spain            | <i>B. oleracea</i> ssp. <i>oleracea</i> |
| 8WS020           | C2-9                              | Spain            | <i>B. oleracea</i> ssp. <i>oleracea</i> |
| 8WS032           | C2-20                             | Spain            | <i>B. oleracea</i> ssp. <i>oleracea</i> |
| 8WS035           | C3-1                              | Spain            | <i>B. oleracea</i> ssp. <i>oleracea</i> |
| 8WS036           | C3-2                              | Spain            | <i>B. oleracea</i> ssp. <i>oleracea</i> |
| 8WS038           | C3-4                              | Spain            | <i>B. oleracea</i> ssp. <i>oleracea</i> |
| 8WS056           | C4-2                              | Spain            | <i>B. oleracea</i> ssp. <i>oleracea</i> |
| 8WS065           | C4-11                             | Spain            | <i>B. oleracea</i> ssp. <i>oleracea</i> |
| 8WS072           | C5-4                              | Spain            | <i>B. oleracea</i> ssp. <i>oleracea</i> |
| 8WS077           | C5-9                              | Spain            | <i>B. oleracea</i> ssp. <i>oleracea</i> |
| 8WS086           | C5-19                             | Spain            | <i>B. oleracea</i> ssp. <i>oleracea</i> |
| 8WS092           | L03                               | Spain            | <i>B. oleracea</i> ssp. <i>oleracea</i> |
| 8WS098           | L09                               | Spain            | <i>B. oleracea</i> ssp. <i>oleracea</i> |
| 8WS099           | L010                              | Spain            | <i>B. oleracea</i> ssp. <i>oleracea</i> |
| 8WS119           | L3-1                              | Spain            | <i>B. oleracea</i> ssp. <i>oleracea</i> |
| 8WS130           | L3-12                             | Spain            | <i>B. oleracea</i> ssp. <i>oleracea</i> |
| 8WS042           | C3-8                              | Spain            | <i>B. oleracea</i> ssp. <i>oleracea</i> |
| 8WS060           | C4-6                              | Spain            | <i>B. oleracea</i> ssp. <i>oleracea</i> |
| 8WS121           | L3-2                              | Spain            | <i>B. oleracea</i> ssp. <i>oleracea</i> |
| 8WS015           | C2-17                             | Spain            | <i>B. oleracea</i> ssp. <i>oleracea</i> |
| 8WS037           | C3-7                              | Spain            | <i>B. oleracea</i> ssp. <i>oleracea</i> |
| 3DH161           | Res-1 (C3-8 × jingxuanhuangxinwu) | –                | Resynthesized <i>B. napus</i>           |
| 6873             | Zhongshuang12                     | Hubei (China)    | Modern cultivar (Semi-winter OSR)       |
|                  | Gaoyouzhongshuang11               | Hubei (China)    | Modern cultivar (Semi-winter OSR)       |
| 7419             | Huyou21                           | Shanghai (China) | Modern cultivar (Semi-winter OSR)       |
| 3455             | H40                               | Zhejiang (China) | Modern cultivar (Semi-winter OSR)       |
| 7423             | G142                              | Zhejiang (China) | Modern cultivar (Semi-winter OSR)       |
| 6648             | Zheyu17                           | Zhejiang (China) | Modern cultivar (Semi-winter OSR)       |
| 3DH146           | Zhongshuang12 × Res-1             | –                | F <sub>1</sub>                          |
| 3DH153           | Huyou21 × Res-1                   | –                | F <sub>1</sub>                          |
| 3DH158           | H40 × Res-1                       | –                | F <sub>1</sub>                          |
| 3DH162           | Zheyu17 × Res-1                   | –                | F <sub>1</sub>                          |
| 3DH155           | G142 × Res-1                      | –                | F <sub>1</sub>                          |
| 3DH152           | Gaoyouzhongshuang11 × Res-1       | –                | F <sub>1</sub>                          |
| 3DH154           | Res-1 × Zhongshuang12             | –                | F <sub>1</sub>                          |

**Supplemental Table 4.** Information on the 43 primer pairs of SSR markers used in this study

| Markers                | Sequence of forward     | Sequence of reverse      | Linkage group (A genome) | Linkage group (C genome) | Allelic variation (A subgenome) | Allelic variation (C subgenome)                                                                                                |
|------------------------|-------------------------|--------------------------|--------------------------|--------------------------|---------------------------------|--------------------------------------------------------------------------------------------------------------------------------|
| BRAS078                | ATTGGGTTCTGACCTTTTCTC   | CTTTTCTCATCGCTACCAC      | A1                       | -                        | 110, 112, 116                   | -                                                                                                                              |
| BRAS084 <sup>c</sup>   | ATTGGGTTCTGACCTTTTCTC   | TTTTCTTCATCGCTACCAC      | A1                       | -                        | 109, 111, 115                   | -                                                                                                                              |
| BnGMS0075              | TCACTAGACGAAAGTTGAGCCA  | TGCTTAIGGTAATGTTTGCCAGG  | A2                       | -                        | 116, 119, 122, 125              | -                                                                                                                              |
| BnGMS0078              | TTAGCTTTAACAGCCAGCTT    | TTGCCCTCTCAATCACTGT      | A2                       | -                        | 228, 232                        | -                                                                                                                              |
| BnGMS0085              | AGAAACGCAAGAGGGTAITCCT  | TGACGGTATGTTTTCAACTCG    | A3                       | -                        | 345, 355, 359, 363              | -                                                                                                                              |
| OL11B05                | TCGGCAGGTTGTTTTGTTC     | ACCATCTTCCCTCGACCCTG     | A3                       | -                        | 110, 114, 118, 120              | -                                                                                                                              |
| BnGMS0165              | ATTGACGCAGTGTCTTCTCT    | AAACAATAAGCCAAACGAAAG    | A4                       | -                        | 346, 356, 360, 364              | -                                                                                                                              |
| BnGMS0135              | GCATCACCCCTAGTTAATCGAA  | AAGAAGGGAGAAACCTGAAACC   | A4                       | -                        | 194, 201, 203, 212              | -                                                                                                                              |
| BnEMS0847              | GTTTGCCTTACAAAGACCTGG   | CACACCTTACCACGTTCTT      | A5                       | -                        | 260, 262                        | -                                                                                                                              |
| BnGMS0662 <sup>c</sup> | CGATCGAATGCACTGTACT     | ATGCACAGAGCTGAAGAAAT     | A5                       | -                        | 199, 201, 203                   | -                                                                                                                              |
| BnGMS0929              | TCAGACCCAAAGCCAGTT      | TTGTGGAAGATGAAACCATT     | A6                       | -                        | 241, 253                        | -                                                                                                                              |
| BnEMS0921              | GTGCTGCTGCTCTTCTTAT     | CAATGAGTAGGGTCCGATGAT    | A6                       | -                        | 153, 157                        | -                                                                                                                              |
| CB10330                | AGCGGATTTACGAGGAT       | ACCTGCACCAATCATTTG       | A6                       | -                        | 138, 140, 146, 150              | -                                                                                                                              |
| BnGMS0171              | GATACACAACACGCAACACAA   | GGATTGCAITGTTCTGACTG     | A7                       | -                        | 174, 178, 186, 190              | -                                                                                                                              |
| BnGMS0422              | TGGAGAAGAAGGCTATACACA   | TCACACAGGGTAAAGGTAG      | A7                       | -                        | 306, 316, 318, 320, 322, 324    | -                                                                                                                              |
| BnGMS0373 <sup>c</sup> | CAGATAAATTTGGTAGCTCA    | TATGGATCTGGAATACTGAA     | A8                       | -                        | 272, 274, 280                   | -                                                                                                                              |
| BnGMS0452              | TAGATGGTCTTGACCCATA     | AACATGCTTTGATGAAGCC      | A8                       | -                        | 201, 205, 207                   | -                                                                                                                              |
| BnEMS0810              | AGAAGAAGCAGCAAGAACAG    | TACTAGTTTCGAAAGCCGAG     | A9                       | -                        | 210, 216, 219                   | -                                                                                                                              |
| BnGMS0961              | CTCACCTTCTAAAGCCATATC   | AAGTGAITACCAGAAAGTCGATGC | A9                       | -                        | 313, 329, 332, 340              | -                                                                                                                              |
| NA10D09                | AAGAACGTCAAGATCCTCTGC   | ACCACACGGTAGTAGAGCG      | A9                       | -                        | 283, 369, 380                   | -                                                                                                                              |
| BnGMS0780              | GCACGATGGCAITCACATAACAT | TTCTGTGCTAGTCTGCC        | A9                       | -                        | 354, 362                        | -                                                                                                                              |
| CB10524                | ATGGAAGGCCAACGATTCT     | TTCGTGCTAGTCTGCC         | A10                      | C9 <sup>d</sup>          | 216, 222, 224                   | 237                                                                                                                            |
| Na10D07                | CTACTTTGATGGACACTTGGC   | TCTGAAATGATAGTCCGGTCC    | A10                      | -                        | 107, 109, 117                   | -                                                                                                                              |
| BnGMS0633              | CCAGTCCCAATCTCAATCAG    | TATTTGTGTTCTCACGATGG     | -                        | C1                       | -                               | 312 <sup>a</sup> , 314, 339 <sup>b</sup> , 348 <sup>b</sup> , 350 <sup>b</sup> , 352 <sup>b</sup> , 354 <sup>b</sup>           |
| CB10258                | ATGATGCCTAGCATGTCC      | AAGCTAAAAGCGAAAAGAACG    | -                        | C1                       | -                               | 155, 161, 167 <sup>b</sup> , 170 <sup>b</sup> , 176 <sup>b</sup> , 180, 183 <sup>b</sup> , 198 <sup>b</sup> , 201 <sup>b</sup> |
| CB10369                | CATTACAGGACCAGAGC       | CAAAAGCCAAAGACAACCAT     | -                        | C1                       | -                               | 148, 165, 168 <sup>b</sup> , 171, 174                                                                                          |
| BnGMS0486              | AAGGAGGAACCAATGTC       | TGATAATGCCACTGATAGGAC    | -                        | C2                       | -                               | 168 <sup>a</sup> , 177 <sup>b</sup> , 180, 183                                                                                 |
| BnGMS0738              | TTGAGGAAGGAACACGAA      | GTGGGAGAGTGAGGGTAGTAA    | -                        | C2                       | -                               | 235 <sup>b</sup> , 238 <sup>b</sup> , 241, 244, 247                                                                            |
| BnGMS0631              | CCATTAITCAITGTTACCACC   | CCTCGCTCCTAGTAGGTACA     | -                        | C3                       | -                               | 361, 363 <sup>b</sup> , 367 <sup>b</sup> , 377 <sup>b</sup> , 401                                                              |
| CB10427                | TCCCAACAAAAGAGTCCA      | CAGCGAACCCGAGTCTAAA      | -                        | C3                       | -                               | 145, 148, 151, 157                                                                                                             |
| BnGMS0490              | AGTTGGTAGCCAAAGTGAAA    | CTCTTATGCCAATCTCATCC     | -                        | C4                       | -                               | 332, 342 <sup>a</sup>                                                                                                          |
| CB10320                | AGTGCATGATGAAGGCAT      | GGGAATCCATGGCTGTA        | -                        | C4                       | -                               | 248254                                                                                                                         |
| BnEMS0158              | GTTATCTTGCTTCACTTCCT    | TACGGCTTCATCTCATACATC    | -                        | C5                       | -                               | 152161                                                                                                                         |
| BnGMS0949              | CTCCTCCTCTTTCATCTTC     | TTCGTCTCCCTTCTCTGTAA     | -                        | A10 <sup>d</sup>         | 240, 250                        | 174, 176, 178 <sup>b</sup> , 180 <sup>b</sup>                                                                                  |
| BnGMS1493              | CGTAGAGAGATTTGGAAGCA    | GTCTCCTCCGTAATGGTGT      | -                        | C6                       | -                               | 162167179                                                                                                                      |
| BnGMS1697 <sup>c</sup> | AGAGACAAACCAAGCCTTGGAC  | GCGAITTCAGAGAGGTAGAGGA   | -                        | C6                       | -                               | 198, 208, 210, 213 <sup>a</sup>                                                                                                |
| BnGMS1909 <sup>c</sup> | AGGTGCAATAAGCTGTCTCTCC  | AAACTCGAGCTTATCAGCTGT    | -                        | C6                       | -                               | 193, 198 <sup>b</sup> , 204, 208 <sup>a</sup>                                                                                  |
| BnGMS0386 <sup>c</sup> | TTGGCTCAITCAATGACAATA   | ACAATGTGGTAAACACGAAA     | -                        | C7                       | -                               | 213216220                                                                                                                      |
| BnGMS2095 <sup>c</sup> | CCATGCTGTAGGCAATAAGTA   | TGGACATGGACCAATAGTAGT    | -                        | C7                       | -                               | 193 <sup>b</sup> , 195 <sup>b</sup> , 208, 212 <sup>b</sup> , 214, 218 <sup>a</sup>                                            |
| BnGMS2499 <sup>c</sup> | TATACGATGTCTCTCCCTCTC   | TCGTACAGGTGAATACGCAAG    | -                        | C7                       | -                               | 192, 204 <sup>b</sup> , 210, 238 <sup>b</sup> , 240 <sup>b</sup>                                                               |
| BnGMS003               | AAAGAGCCACATGAAAGTA     | TGAACCTAGGCACCAAGAAT     | -                        | C8                       | -                               | 329, 335, 338 <sup>a</sup> , 359 <sup>a</sup> , 362 <sup>a</sup>                                                               |
| BnEMS0509 <sup>c</sup> | TGAATGTGCTTCTTCGATG     | TTCAAGCTCGTTCACCTCT      | -                        | C8                       | -                               | 198, 202 <sup>a</sup> , 210                                                                                                    |
| BnEMS0628a             | GCTAAGGGTGGTCTTATCT     | TCTCAACACCAAAAGAACAAA    | -                        | C9                       | -                               | 267, 271, 274 <sup>b</sup>                                                                                                     |
| BnEMS0628b             | GCTAAGGGTGGTCTTATCT     | TCTCAACACCAAAAGAACAAA    | -                        | C9                       | -                               | 258, 261                                                                                                                       |

<sup>a</sup> represents the allelic variation exists in *B. napus* but not in *B. oleracea*.

<sup>b</sup> represents the allelic variation exists in *B. oleracea* but not in *B. napus*.

<sup>c</sup> represents the single-locus nature of the marker that was also detected by Li, Q. *et al.* (2013).

<sup>d</sup> represents the chromosome information that was inferred by aligning their sequences with the genome sequence of *B. rapa* and *B. oleracea* by using BLASTn.
